# Supplementary material for: A spatiotemporally separated framework for reconstructing the sources of atmospheric radionuclide releases
Source: Copernicus journal article supplement (doi:10.5194/gmd-17-4961-2024), 2024-06-25
Supplement: Supplementary file 1 [file gmd-17-4961-2024-supplement.pdf]

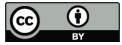

*Supplement of*

## **A spatiotemporally separated framework for reconstructing the sources of atmospheric radionuclide releases**

**Yuhan Xu et al.**

*Correspondence to:* Sheng Fang (fangsheng@tsinghua.edu.cn)

The copyright of individual parts of the supplement might differ from the article licence.

9 **Note S1: Bayesian method for source reconstruction**

10 The Bayesian method is combined with Markov chain Monte Carlo sampling to estimate the source location and release rate  
 11 simultaneously. Bayes' theorem can be expressed as:

$$12 \quad p(\mathbf{s}|\boldsymbol{\mu}) \propto p(\boldsymbol{\mu}|\mathbf{s})p(\mathbf{s}), \quad (\text{S1})$$

13 where  $\mathbf{s}$  is the parameter vector containing source parameters and  $\boldsymbol{\mu}$  is an observation vector.  $p(\mathbf{s})$  describes the probability  
 14 distribution of prior knowledge on  $\mathbf{s}$  and  $p(\boldsymbol{\mu}|\mathbf{s})$  is the likelihood function quantifying the goodness of fit between the  
 15 simulations and observations. Consistent with general approaches, we define  $p(\mathbf{s})$  as the uniform distribution bounded by the  
 16 lower and upper limits of the source parameters. Referring to (Dumont Le Brazidec et al., 2021),  $p(\boldsymbol{\mu}|\mathbf{s})$  is defined as the log-  
 17 Cauchy distribution:

$$18 \quad p(\boldsymbol{\mu}|\mathbf{s}) = -\sum_{i=1}^O \ln \left\{ r + \left[ \ln(\mu_i + \mu_t) - \ln \left( (F(\mathbf{s}))_i + \mu_t \right) \right]^2 \right\} + \frac{1}{2} \ln(r), \quad (\text{S2})$$

19 where  $O$  is the number of observations;  $F$  is a function that maps the source parameters to the simulations;  $r$  is a covariance  
 20 parameter which forms the covariance matrix  $\mathbf{R} = r\mathbf{I}$  and  $\mu_t$  is a positive threshold that ensures the logarithm is defined  
 21 properly for zero measurements or simulations.

22 However, the release rate is time-varied, so it is not realistic to define the prior distribution of the release rate in every time  
 23 step. Hence, we incorporate the source inversion method into this process, which involves calculating the corresponding release  
 24 rate for the sampled source location and then obtaining Eq. (S3) using the sampled location and calculated release rate. We  
 25 apply a traditional Tikhonov method to calculate the release rate as follows:

$$26 \quad \mathbf{q}(\mathbf{r}) = \operatorname{argmin} \left( \frac{1}{2} \|\boldsymbol{\mu} - \mathbf{A}(\mathbf{r})\mathbf{q}\|_2^2 + \frac{1}{2} \lambda^2 \|\mathbf{q}\|_2^2 \right), \quad (\text{S3})$$

27 where  $\mathbf{q}(\mathbf{r})$  refers to the estimated release rate vector under the source location  $\mathbf{r}$  and  $\mathbf{A}(\mathbf{r})$  refers to the source–receptor matrix  
 28 given  $\mathbf{r}$ .  $\lambda$  is a regularization parameter that is automatically selected by generalized cross-validation (Hansen and O'Leary,  
 29 1993).

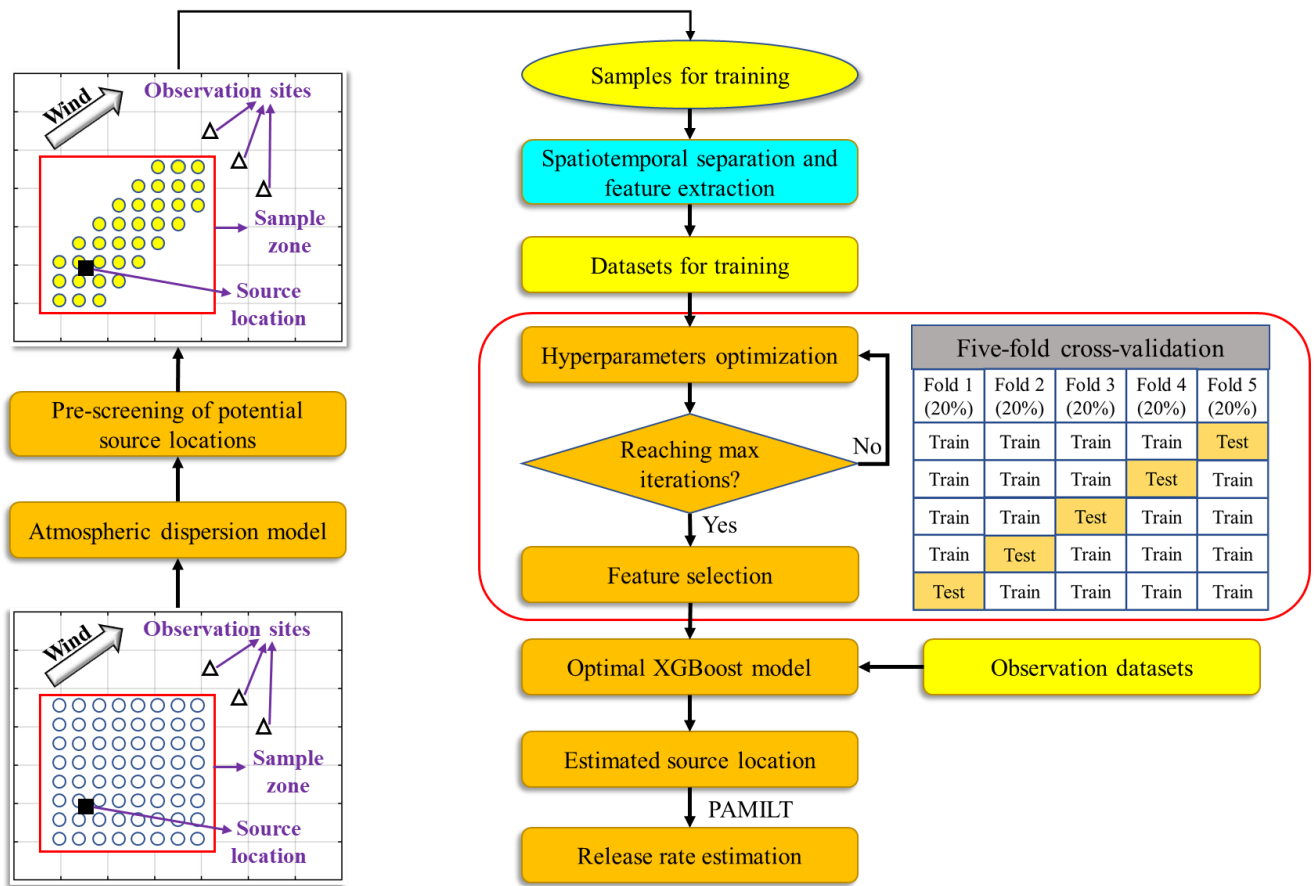

30

31 **Figure S1.** Flowchart of the proposed spatiotemporally separated source reconstruction method.

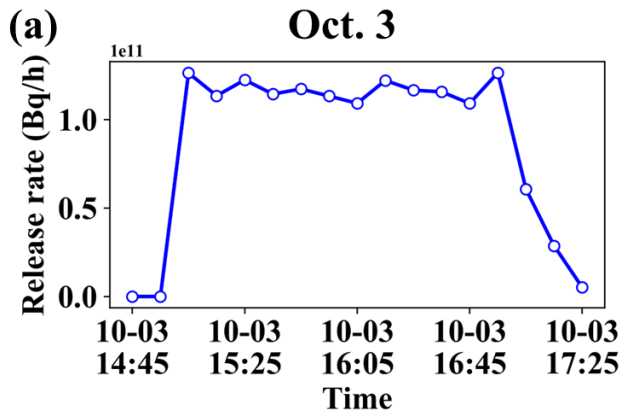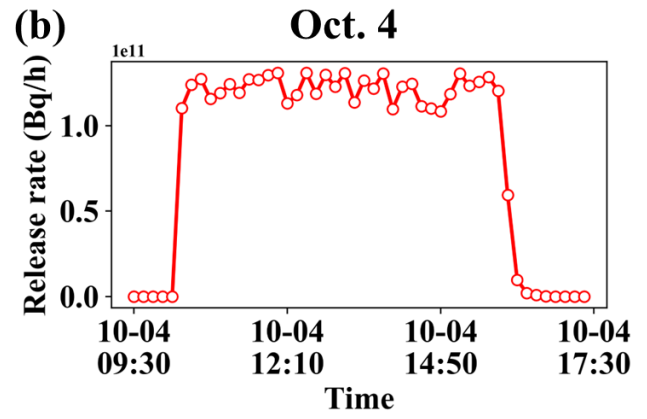

32

33

**Figure S2.** Synthetic release rates for generating synthetic observations of SCK CEN <sup>41</sup>Ar experiment. (a) 3 October; (b) 4 October.

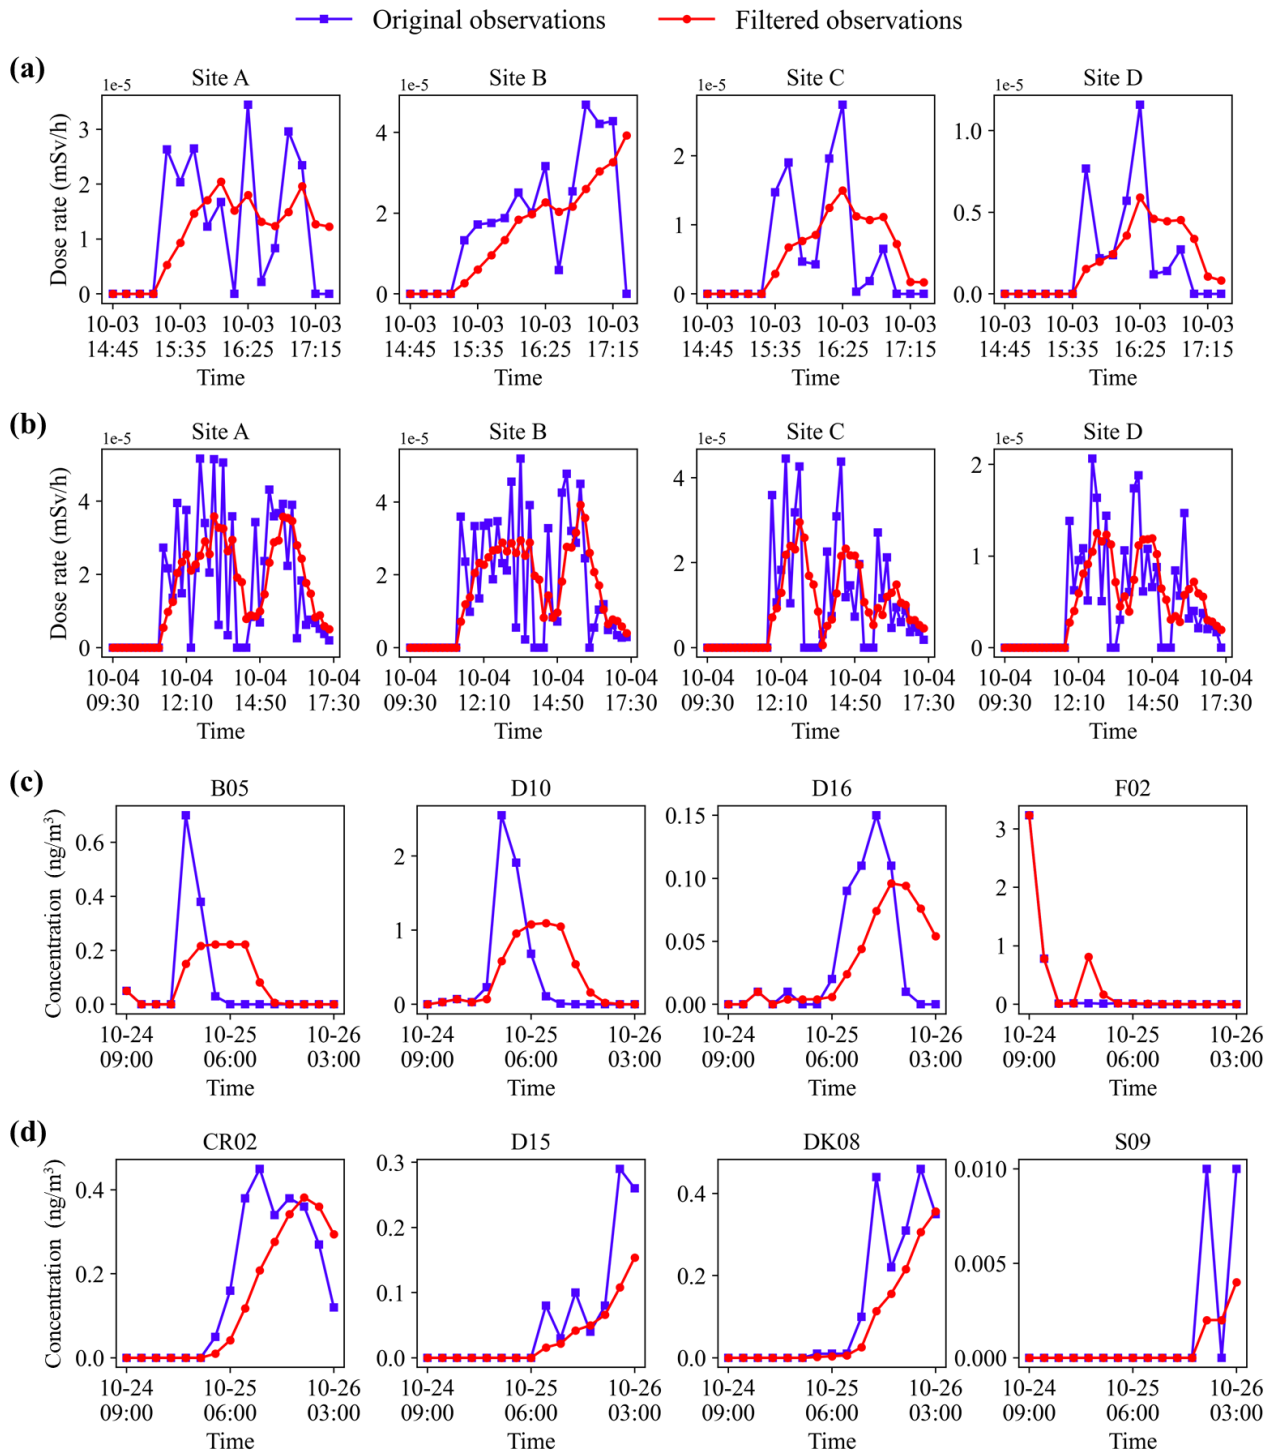

34

35 **Figure S3.** Observations before and after filtering at observation sites. SCK CEN  $^{41}\text{Ar}$  experiment: (a) 3 October; (b) 4 October. ETEX-1  
 36 experiment: (c) Group 1; (d) Group 2.

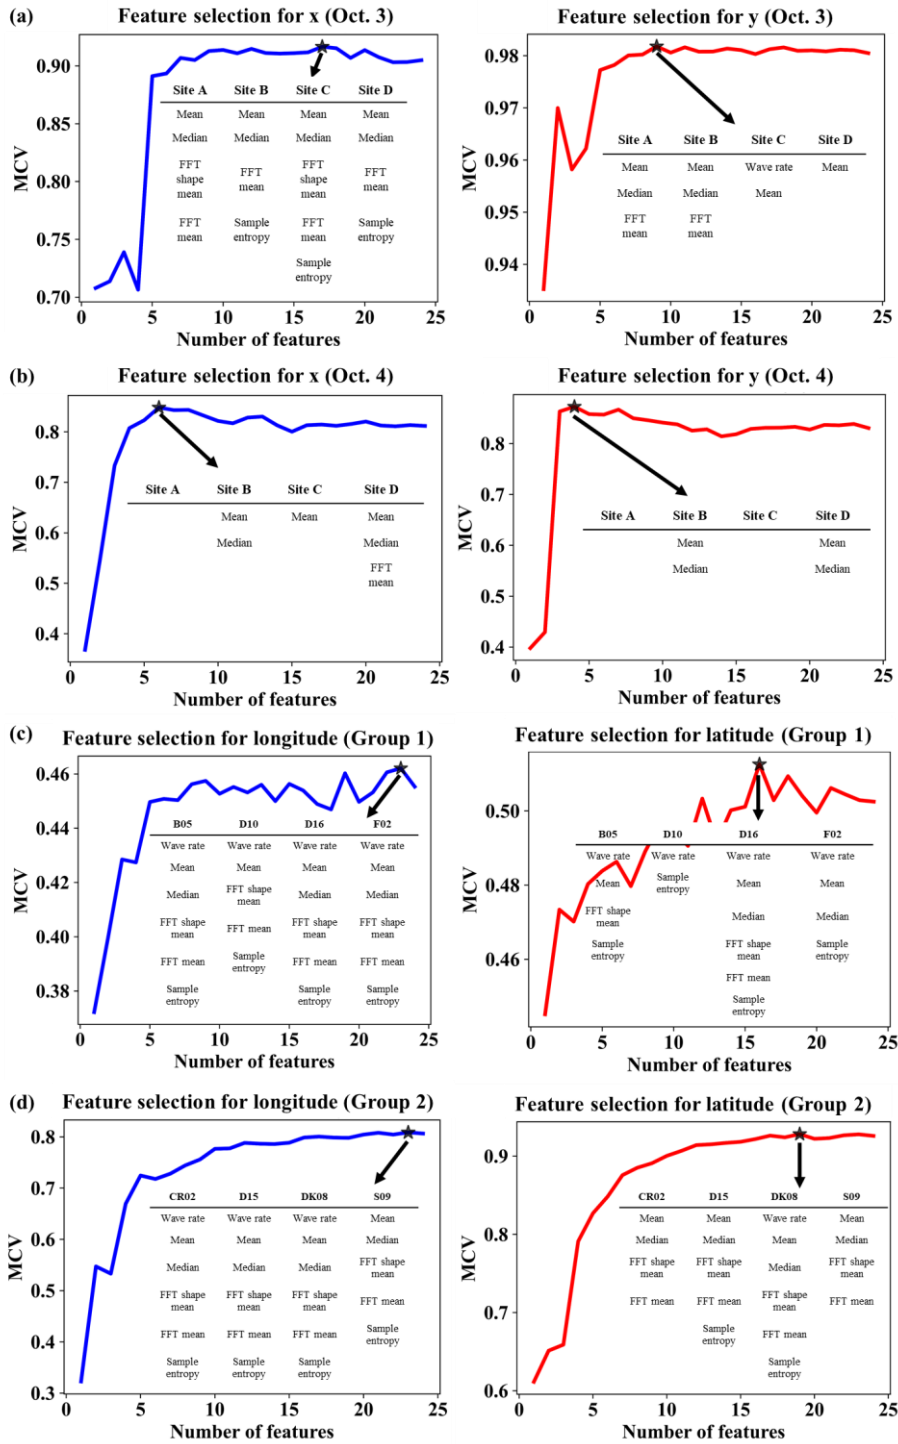

37

38 **Figure S4.** Results of feature selection in x (longitude) and y (latitude) directions. SCK CEN  $^{41}\text{Ar}$  experiment: (a) 3 October; (b) 4 October.  
 39 ETEX-1 experiment: (c) Group 1; (d) Group 2. The black stars denote the optimal number of features. The table inserted in each subgraph  
 40 lists the selected features for each observation site.

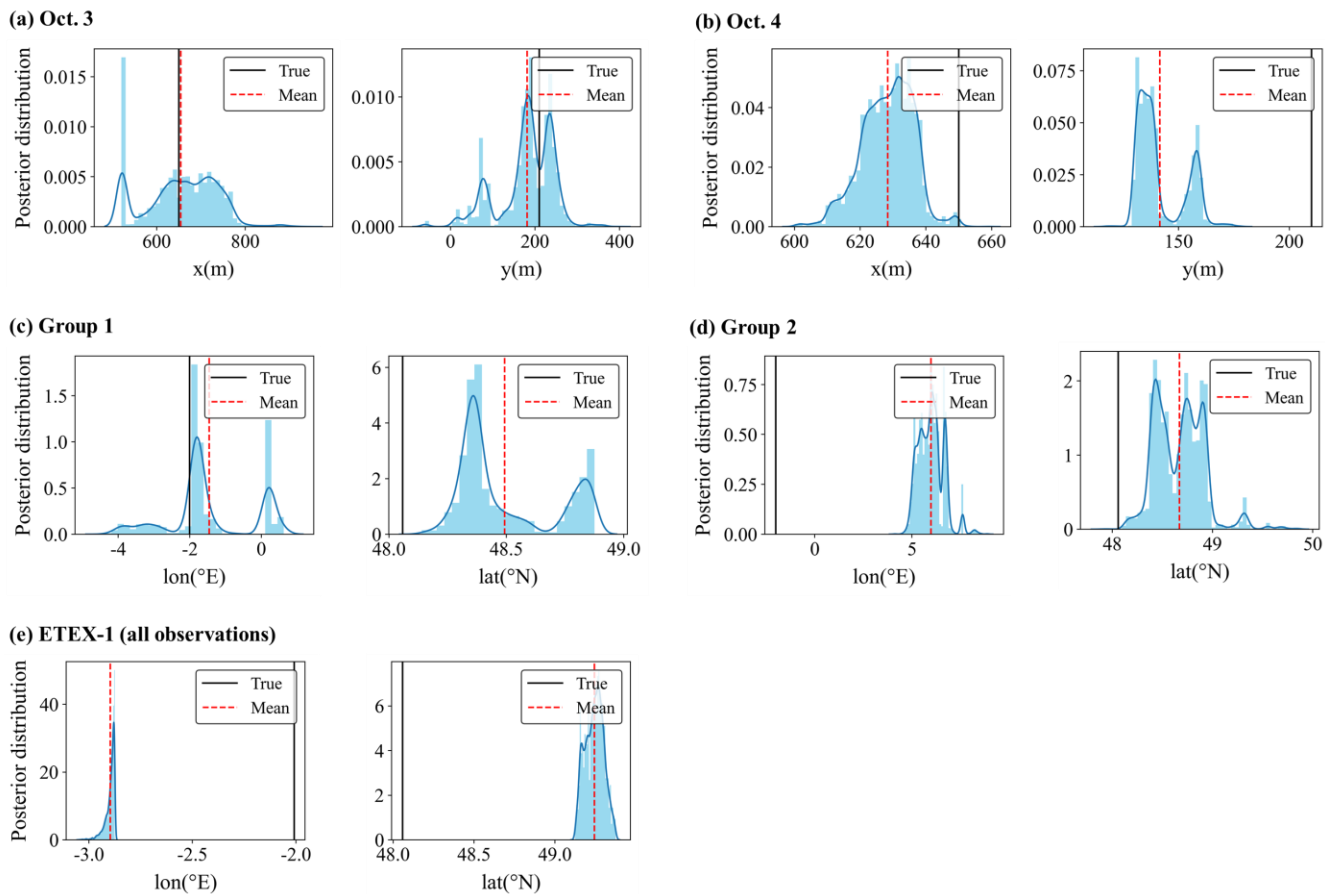

41

42 **Figure S5.** Posterior distributions of source location parameters. SCK CEN  $^{41}\text{Ar}$  experiment: (a) 3 October; (b) 4 October. ETEX-1  
 43 experiment: (c) Group 1; (d) Group 2; (e) ETEX-1 (all observations in ETEX-1 are used). The black solid lines denote the true location  
 44 parameters and the dashed lines denote the mean estimates of all posterior samples.

45

46 **Table S1.** Hyperparameter optimization results. *max\_depth*-maximum depth of a decision tree; *learning\_rate*-step size shrinkage when  
 47 updating; *n\_estimators*-number of decision trees; *min\_child\_weight*-minimum sum of sample weight of a child node; *subsample*-subsample  
 48 ratio of the training samples; *colsample\_bytree*-subsample ratio of columns when constructing a decision tree; *reg\_lambda*-L2 regularization  
 49 term on weights; and *gamma*-minimum loss reduction required to split the decision tree.

| Optimization results |                                    | SCK CEN <sup>41</sup> Ar experiment |           | ETEX-1 experiment |         |
|----------------------|------------------------------------|-------------------------------------|-----------|-------------------|---------|
|                      |                                    | 3 October                           | 4 October | Group 1           | Group 2 |
| Hyperparameters      | <i>max_depth</i> ([3,8])           | 8                                   | 7         | 3                 | 7       |
|                      | <i>learning_rate</i> ([0.05,0.3])  | 0.07057                             | 0.14413   | 0.06860           | 0.07619 |
|                      | <i>n_estimators</i> ([50,300])     | 283                                 | 185       | 93                | 234     |
|                      | <i>min_child_weight</i> ([2,10])   | 4                                   | 10        | 8                 | 6       |
|                      | <i>subsample</i> ([0.5,1])         | 0.62353                             | 0.52721   | 0.66447           | 0.62146 |
|                      | <i>colsample_bytree</i> ([0.01,1]) | 0.39145                             | 0.57415   | 0.33031           | 0.77954 |
|                      | <i>reg_lambda</i> ([0.01,5])       | 0.71074                             | 2.30624   | 3.95098           | 4.62217 |
|                      | <i>gamma</i> ([0.01,1])            | 0.47779                             | 0.51660   | 0.67626           | 0.85628 |
| Optimal GC           | 0.01230                            | 0.03700                             | 0.88040   | 0.44510           |         |

50



51 **Table S2.** Hyperparameter optimization results of all 50 runs for 3 October of SCK CEN <sup>41</sup>Ar experiment.

| Run | Hyperparameters  |                      |                     |                         |                  |                         |                   |              |
|-----|------------------|----------------------|---------------------|-------------------------|------------------|-------------------------|-------------------|--------------|
|     | <i>max_depth</i> | <i>learning_rate</i> | <i>n_estimators</i> | <i>min_child_weight</i> | <i>subsample</i> | <i>colsample_bytree</i> | <i>reg_lambda</i> | <i>gamma</i> |
| 1   | 8                | 0.06963              | 257                 | 2                       | 0.58442          | 0.99833                 | 0.56084           | 0.03347      |
| 2   | 8                | 0.05003              | 261                 | 3                       | 0.65774          | 0.76821                 | 3.67031           | 0.40337      |
| 3   | 7                | 0.08651              | 246                 | 4                       | 0.76497          | 0.86844                 | 1.82068           | 0.02107      |
| 4   | 3                | 0.10114              | 240                 | 3                       | 0.72483          | 0.99964                 | 1.90473           | 0.40321      |
| 5   | 4                | 0.09505              | 299                 | 4                       | 0.86627          | 0.91229                 | 2.72513           | 0.73273      |
| 6   | 6                | 0.12811              | 198                 | 4                       | 0.86151          | 0.91167                 | 2.01739           | 0.64585      |
| 7   | 8                | 0.12143              | 160                 | 5                       | 0.76193          | 0.87631                 | 1.32947           | 0.10111      |
| 8   | 4                | 0.10118              | 149                 | 2                       | 0.75307          | 0.47997                 | 1.42352           | 0.32648      |
| 9   | 6                | 0.08344              | 203                 | 2                       | 0.73900          | 0.58051                 | 4.27579           | 0.36316      |
| 10  | 6                | 0.08371              | 293                 | 4                       | 0.70524          | 0.50305                 | 1.58921           | 0.90349      |
| 11  | 6                | 0.08044              | 203                 | 7                       | 0.74233          | 0.83712                 | 1.87067           | 0.66921      |
| 12  | 8                | 0.08750              | 298                 | 5                       | 0.73452          | 0.95439                 | 3.24463           | 0.23793      |
| 13  | 8                | 0.12917              | 218                 | 5                       | 0.64402          | 0.57828                 | 0.79801           | 0.43434      |
| 14  | 5                | 0.09389              | 279                 | 2                       | 0.97316          | 0.80680                 | 1.61133           | 0.05062      |
| 15  | 8                | 0.14586              | 255                 | 9                       | 0.54883          | 0.74530                 | 3.62691           | 0.21478      |
| 16  | 8                | 0.09194              | 160                 | 3                       | 0.59974          | 0.83406                 | 0.33249           | 0.18032      |
| 17  | 4                | 0.08920              | 257                 | 2                       | 0.67346          | 0.99730                 | 0.98970           | 0.17230      |
| 18  | 4                | 0.09419              | 294                 | 4                       | 0.79714          | 0.87812                 | 3.77772           | 0.88406      |
| 19  | 5                | 0.07604              | 299                 | 3                       | 0.79858          | 0.83297                 | 0.36589           | 0.27070      |
| 20  | 6                | 0.08451              | 231                 | 3                       | 0.76571          | 0.89974                 | 2.67871           | 0.31997      |
| 21  | 5                | 0.15257              | 203                 | 3                       | 0.83687          | 0.94582                 | 1.67365           | 0.06759      |
| 22  | 4                | 0.14711              | 180                 | 3                       | 0.82554          | 0.79287                 | 1.10286           | 0.31295      |

|    |   |         |     |   |         |         |         |         |
|----|---|---------|-----|---|---------|---------|---------|---------|
| 23 | 5 | 0.08729 | 285 | 2 | 0.67684 | 0.91908 | 0.81695 | 0.76090 |
| 24 | 8 | 0.09440 | 235 | 2 | 0.66775 | 0.88929 | 4.40930 | 0.04806 |
| 25 | 7 | 0.10085 | 216 | 3 | 0.58725 | 0.68488 | 1.70407 | 0.25164 |
| 26 | 8 | 0.09937 | 200 | 3 | 0.83402 | 0.78555 | 3.59830 | 0.55999 |
| 27 | 3 | 0.12772 | 189 | 6 | 0.75408 | 0.99256 | 1.67164 | 0.24484 |
| 28 | 8 | 0.10973 | 183 | 2 | 0.50393 | 0.53818 | 0.67395 | 0.18678 |
| 29 | 6 | 0.09468 | 185 | 2 | 0.59535 | 0.75381 | 2.10634 | 0.48731 |
| 30 | 6 | 0.09652 | 247 | 3 | 0.69860 | 0.95369 | 0.05146 | 0.48637 |
| 31 | 7 | 0.06846 | 185 | 5 | 0.52549 | 0.61305 | 0.97320 | 0.17339 |
| 32 | 8 | 0.09323 | 215 | 4 | 0.74269 | 0.98432 | 4.30255 | 0.28215 |
| 33 | 7 | 0.09339 | 299 | 6 | 0.61681 | 0.49190 | 2.27687 | 0.96352 |
| 34 | 7 | 0.11693 | 234 | 3 | 0.74464 | 0.54387 | 1.02597 | 0.63504 |
| 35 | 4 | 0.06858 | 277 | 2 | 0.74264 | 0.92278 | 1.30424 | 0.81347 |
| 36 | 5 | 0.08068 | 246 | 5 | 0.73714 | 0.99006 | 1.39783 | 0.27963 |
| 37 | 8 | 0.08645 | 274 | 4 | 0.82352 | 0.99618 | 3.59875 | 0.82528 |
| 38 | 7 | 0.18011 | 226 | 8 | 0.66425 | 0.81094 | 0.98036 | 0.11274 |
| 39 | 5 | 0.08397 | 212 | 3 | 0.62934 | 0.45110 | 1.94896 | 0.64913 |
| 40 | 5 | 0.07800 | 228 | 2 | 0.66806 | 0.91700 | 0.32409 | 0.53206 |
| 41 | 6 | 0.07905 | 231 | 4 | 0.63064 | 0.93657 | 0.01082 | 0.03863 |
| 42 | 3 | 0.09277 | 261 | 3 | 0.72093 | 0.96486 | 1.73917 | 0.39009 |
| 43 | 5 | 0.08732 | 217 | 2 | 0.81405 | 0.78575 | 1.71376 | 0.85775 |
| 44 | 5 | 0.08417 | 225 | 3 | 0.61443 | 0.61703 | 2.06192 | 0.93001 |
| 45 | 8 | 0.14916 | 188 | 4 | 0.71686 | 0.87552 | 0.21908 | 0.58120 |
| 46 | 6 | 0.10745 | 179 | 3 | 0.82311 | 0.92434 | 3.99176 | 0.29124 |
| 47 | 4 | 0.13632 | 252 | 4 | 0.83077 | 0.92543 | 3.17264 | 0.31258 |
| 48 | 8 | 0.12402 | 176 | 4 | 0.70048 | 0.75866 | 3.18949 | 0.92647 |

|    |   |         |     |   |         |         |         |         |
|----|---|---------|-----|---|---------|---------|---------|---------|
| 49 | 8 | 0.07057 | 283 | 4 | 0.62353 | 0.39145 | 0.71074 | 0.47779 |
| 50 | 5 | 0.11104 | 197 | 3 | 0.79114 | 0.86436 | 3.16004 | 0.19049 |

---

52

**Table S3.** Hyperparameter optimization results of all 50 runs for 4 October of SCK CEN  $^{41}\text{Ar}$  experiment.

| Run | Hyperparameters  |                      |                     |                         |                  |                         |                   |              |
|-----|------------------|----------------------|---------------------|-------------------------|------------------|-------------------------|-------------------|--------------|
|     | <i>max_depth</i> | <i>learning_rate</i> | <i>n_estimators</i> | <i>min_child_weight</i> | <i>subsample</i> | <i>colsample_bytree</i> | <i>reg_lambda</i> | <i>gamma</i> |
| 1   | 5                | 0.07095              | 242                 | 10                      | 0.53823          | 0.98511                 | 3.43106           | 0.47567      |
| 2   | 6                | 0.13148              | 121                 | 10                      | 0.52493          | 0.91239                 | 4.40584           | 0.19543      |
| 3   | 7                | 0.15575              | 102                 | 9                       | 0.50009          | 0.80159                 | 1.43484           | 0.98014      |
| 4   | 7                | 0.10178              | 245                 | 9                       | 0.50621          | 0.55022                 | 2.84160           | 0.78872      |
| 5   | 6                | 0.15994              | 88                  | 9                       | 0.54667          | 0.93870                 | 0.68681           | 0.82277      |
| 6   | 6                | 0.07483              | 221                 | 7                       | 0.50084          | 0.97352                 | 3.24507           | 0.65469      |
| 7   | 7                | 0.08191              | 179                 | 8                       | 0.50132          | 0.99302                 | 4.00168           | 0.63458      |
| 8   | 5                | 0.05154              | 256                 | 10                      | 0.50279          | 0.97827                 | 1.93594           | 0.01850      |
| 9   | 8                | 0.05644              | 294                 | 10                      | 0.56394          | 0.84780                 | 2.05943           | 0.27115      |
| 10  | 4                | 0.07670              | 281                 | 10                      | 0.53927          | 0.97848                 | 4.82450           | 0.27244      |
| 11  | 6                | 0.13550              | 112                 | 10                      | 0.53406          | 0.53254                 | 2.40913           | 0.53195      |
| 12  | 6                | 0.08587              | 203                 | 10                      | 0.63046          | 0.84871                 | 4.82865           | 0.96621      |
| 13  | 7                | 0.09585              | 288                 | 10                      | 0.50229          | 0.99575                 | 4.49999           | 0.55975      |
| 14  | 7                | 0.08191              | 245                 | 10                      | 0.54189          | 0.87572                 | 3.95663           | 0.85872      |
| 15  | 7                | 0.07474              | 174                 | 7                       | 0.51174          | 0.96561                 | 2.97146           | 0.92806      |
| 16  | 5                | 0.08019              | 212                 | 9                       | 0.50228          | 0.98434                 | 4.45686           | 0.41716      |
| 17  | 8                | 0.07642              | 205                 | 9                       | 0.52041          | 0.84692                 | 4.46048           | 0.41196      |
| 18  | 8                | 0.08315              | 218                 | 10                      | 0.56530          | 0.92783                 | 4.49138           | 0.69385      |
| 19  | 7                | 0.09760              | 171                 | 10                      | 0.57999          | 0.74319                 | 0.76715           | 0.72171      |
| 20  | 5                | 0.10593              | 142                 | 9                       | 0.52512          | 0.99411                 | 0.89520           | 0.27131      |
| 21  | 8                | 0.07079              | 185                 | 9                       | 0.50469          | 0.87378                 | 1.08559           | 0.25444      |
| 22  | 6                | 0.11366              | 183                 | 9                       | 0.57435          | 0.77739                 | 3.16044           | 0.93374      |

|    |   |         |     |    |         |         |         |         |
|----|---|---------|-----|----|---------|---------|---------|---------|
| 23 | 6 | 0.11157 | 254 | 9  | 0.52017 | 0.97489 | 1.90816 | 0.79666 |
| 24 | 7 | 0.11255 | 188 | 8  | 0.50796 | 0.74881 | 1.66455 | 0.77696 |
| 25 | 7 | 0.18193 | 79  | 10 | 0.68663 | 0.99816 | 2.79139 | 0.92738 |
| 26 | 5 | 0.20795 | 137 | 10 | 0.60099 | 0.37442 | 4.72568 | 0.01013 |
| 27 | 5 | 0.08039 | 208 | 10 | 0.55245 | 0.85163 | 2.68594 | 0.57202 |
| 28 | 4 | 0.13824 | 232 | 9  | 0.53167 | 0.97794 | 4.99790 | 0.72989 |
| 29 | 5 | 0.11709 | 264 | 10 | 0.50079 | 0.65333 | 4.99177 | 0.01211 |
| 30 | 7 | 0.08384 | 183 | 9  | 0.54315 | 0.85012 | 2.95216 | 0.68107 |
| 31 | 7 | 0.07624 | 243 | 10 | 0.51390 | 0.68864 | 2.39622 | 0.79548 |
| 32 | 8 | 0.12670 | 219 | 9  | 0.51735 | 0.51438 | 4.86510 | 0.39015 |
| 33 | 7 | 0.17030 | 133 | 8  | 0.50620 | 0.74374 | 4.58307 | 0.02592 |
| 34 | 6 | 0.17322 | 101 | 7  | 0.54173 | 0.74255 | 4.24794 | 0.97291 |
| 35 | 4 | 0.09476 | 222 | 10 | 0.50025 | 0.77689 | 4.46467 | 0.83712 |
| 36 | 7 | 0.10917 | 175 | 9  | 0.52491 | 0.91604 | 2.16957 | 0.73717 |
| 37 | 7 | 0.08104 | 168 | 10 | 0.50263 | 0.50745 | 3.81626 | 0.69286 |
| 38 | 5 | 0.13034 | 245 | 10 | 0.50188 | 0.76513 | 2.11312 | 0.03408 |
| 39 | 8 | 0.08419 | 196 | 10 | 0.55446 | 0.85748 | 4.85152 | 0.63630 |
| 40 | 8 | 0.08592 | 205 | 10 | 0.52833 | 0.88829 | 2.58534 | 0.47814 |
| 41 | 6 | 0.16963 | 80  | 8  | 0.56274 | 0.94076 | 3.32882 | 0.66880 |
| 42 | 7 | 0.14335 | 123 | 8  | 0.56362 | 0.91686 | 4.92034 | 0.02893 |
| 43 | 8 | 0.12178 | 183 | 10 | 0.58719 | 0.86078 | 3.42019 | 0.41184 |
| 44 | 7 | 0.14413 | 185 | 10 | 0.52721 | 0.57415 | 2.30624 | 0.51660 |
| 45 | 6 | 0.08748 | 221 | 10 | 0.50936 | 0.70774 | 2.06636 | 0.28648 |
| 46 | 7 | 0.08946 | 176 | 10 | 0.55001 | 0.92642 | 3.51959 | 0.19652 |
| 47 | 7 | 0.09190 | 157 | 8  | 0.63144 | 0.74802 | 0.11220 | 0.61326 |
| 48 | 5 | 0.13140 | 200 | 10 | 0.51145 | 0.69994 | 3.88528 | 0.53884 |

|    |   |         |     |    |         |         |         |         |
|----|---|---------|-----|----|---------|---------|---------|---------|
| 49 | 5 | 0.12585 | 187 | 10 | 0.50120 | 0.93257 | 2.44567 | 0.98524 |
| 50 | 6 | 0.07366 | 250 | 9  | 0.53270 | 0.95103 | 1.97326 | 0.23232 |

---

54

55 **Table S4.** Hyperparameter optimization results of all 50 runs for Group 1 of ETEX-1 experiment.

| Run | Hyperparameters  |                      |                     |                         |                  |                         |                   |              |
|-----|------------------|----------------------|---------------------|-------------------------|------------------|-------------------------|-------------------|--------------|
|     | <i>max_depth</i> | <i>learning_rate</i> | <i>n_estimators</i> | <i>min_child_weight</i> | <i>subsample</i> | <i>colsample_bytree</i> | <i>reg_lambda</i> | <i>gamma</i> |
| 1   | 3                | 0.07742              | 63                  | 9                       | 0.55953          | 0.44389                 | 0.35824           | 0.81392      |
| 2   | 4                | 0.05011              | 142                 | 3                       | 0.70683          | 0.23027                 | 4.89201           | 0.98193      |
| 3   | 3                | 0.06110              | 99                  | 2                       | 0.93364          | 0.37012                 | 2.20274           | 0.76370      |
| 4   | 7                | 0.06117              | 64                  | 10                      | 0.55117          | 0.24878                 | 2.34822           | 0.07471      |
| 5   | 3                | 0.07906              | 76                  | 9                       | 0.71631          | 0.38280                 | 1.84573           | 0.22755      |
| 6   | 3                | 0.05067              | 116                 | 4                       | 0.70755          | 0.37613                 | 1.50917           | 0.85795      |
| 7   | 3                | 0.06296              | 86                  | 9                       | 0.76834          | 0.34797                 | 1.04674           | 0.44097      |
| 8   | 3                | 0.05342              | 106                 | 5                       | 0.53520          | 0.18199                 | 4.18213           | 0.89476      |
| 9   | 3                | 0.07584              | 76                  | 4                       | 0.95540          | 0.53685                 | 1.30937           | 0.49309      |
| 10  | 3                | 0.07213              | 84                  | 5                       | 0.98527          | 0.41048                 | 2.61014           | 0.06896      |
| 11  | 3                | 0.05907              | 115                 | 6                       | 0.74495          | 0.37051                 | 1.96059           | 0.27702      |
| 12  | 3                | 0.09471              | 76                  | 3                       | 0.91290          | 0.51041                 | 0.38558           | 0.05232      |
| 13  | 3                | 0.07018              | 103                 | 3                       | 0.87242          | 0.35732                 | 2.77176           | 0.16073      |
| 14  | 3                | 0.07072              | 95                  | 10                      | 0.98317          | 0.34966                 | 4.67025           | 0.95006      |
| 15  | 3                | 0.08357              | 66                  | 2                       | 0.80913          | 0.37858                 | 2.74202           | 0.05494      |
| 16  | 3                | 0.05001              | 121                 | 3                       | 0.52214          | 0.27101                 | 4.30584           | 0.30632      |
| 17  | 3                | 0.09354              | 50                  | 6                       | 0.64736          | 0.62473                 | 2.55863           | 0.35745      |
| 18  | 3                | 0.05486              | 134                 | 8                       | 0.66206          | 0.71278                 | 0.80280           | 0.97413      |
| 19  | 3                | 0.07556              | 102                 | 5                       | 0.70927          | 0.34789                 | 3.12167           | 0.99997      |
| 20  | 3                | 0.07479              | 52                  | 9                       | 0.79240          | 0.56720                 | 1.02323           | 0.32951      |
| 21  | 3                | 0.05518              | 78                  | 10                      | 0.66309          | 0.99871                 | 3.14571           | 0.84078      |
| 22  | 3                | 0.05139              | 111                 | 6                       | 0.73839          | 0.42603                 | 2.49218           | 0.87318      |

|    |   |         |     |    |         |         |         |         |
|----|---|---------|-----|----|---------|---------|---------|---------|
| 23 | 3 | 0.10952 | 50  | 5  | 0.97390 | 0.22350 | 0.88047 | 0.35097 |
| 24 | 3 | 0.06860 | 93  | 8  | 0.66447 | 0.33031 | 3.95098 | 0.67626 |
| 25 | 3 | 0.08670 | 54  | 5  | 0.79857 | 0.39303 | 3.19098 | 0.54197 |
| 26 | 3 | 0.08125 | 67  | 8  | 0.94963 | 0.33151 | 4.40350 | 0.06507 |
| 27 | 3 | 0.08396 | 50  | 2  | 0.93428 | 0.37792 | 3.77359 | 0.13881 |
| 28 | 3 | 0.05418 | 95  | 9  | 0.99598 | 0.25227 | 1.60204 | 0.38791 |
| 29 | 3 | 0.06935 | 89  | 8  | 0.90482 | 0.35876 | 4.15848 | 0.85423 |
| 30 | 3 | 0.06319 | 76  | 2  | 0.91583 | 0.43665 | 3.35600 | 0.88327 |
| 31 | 3 | 0.09009 | 50  | 4  | 0.94183 | 0.48645 | 4.03998 | 0.17582 |
| 32 | 3 | 0.06213 | 148 | 8  | 0.69235 | 0.34063 | 1.38470 | 0.71691 |
| 33 | 3 | 0.05735 | 74  | 10 | 0.83704 | 0.36175 | 2.28311 | 0.93893 |
| 34 | 3 | 0.06437 | 72  | 3  | 0.98748 | 0.31363 | 1.63480 | 0.22685 |
| 35 | 3 | 0.06022 | 60  | 6  | 0.66204 | 0.69317 | 1.21692 | 0.30900 |
| 36 | 3 | 0.09555 | 53  | 5  | 0.80980 | 0.46487 | 1.90000 | 0.60232 |
| 37 | 3 | 0.08434 | 50  | 8  | 0.52774 | 0.26641 | 0.48391 | 0.31574 |
| 38 | 3 | 0.07105 | 51  | 5  | 0.96131 | 0.63725 | 2.01205 | 0.60509 |
| 39 | 4 | 0.05005 | 62  | 10 | 0.77964 | 0.22026 | 3.55884 | 0.74839 |
| 40 | 4 | 0.07553 | 74  | 2  | 0.99323 | 0.36292 | 2.61782 | 0.17595 |
| 41 | 3 | 0.05239 | 77  | 7  | 0.50028 | 0.95751 | 2.41469 | 0.72211 |
| 42 | 3 | 0.08421 | 51  | 5  | 0.99977 | 0.45864 | 2.15063 | 0.54258 |
| 43 | 3 | 0.05414 | 82  | 8  | 0.62226 | 0.76122 | 2.83002 | 0.53414 |
| 44 | 3 | 0.05259 | 111 | 4  | 0.93432 | 0.32197 | 2.04760 | 0.44156 |
| 45 | 3 | 0.09454 | 60  | 4  | 0.72047 | 0.23879 | 4.65624 | 0.75740 |
| 46 | 3 | 0.05013 | 93  | 4  | 0.58250 | 0.40493 | 2.11383 | 0.47864 |
| 47 | 3 | 0.11330 | 50  | 2  | 0.71413 | 0.69524 | 3.50503 | 0.16269 |
| 48 | 3 | 0.08314 | 50  | 10 | 0.96691 | 0.50529 | 2.97909 | 0.95771 |



|    |   |         |     |   |         |         |         |         |
|----|---|---------|-----|---|---------|---------|---------|---------|
| 49 | 6 | 0.05978 | 107 | 7 | 0.63666 | 0.20488 | 0.61715 | 0.79254 |
| 50 | 3 | 0.07770 | 71  | 3 | 0.98943 | 0.58108 | 1.17867 | 0.22360 |

---

56

57 **Table S5.** Hyperparameter optimization results of all 50 runs for Group 2 of ETEX-1 experiment.

| Run | Hyperparameters  |                      |                     |                         |                  |                         |                   |              |
|-----|------------------|----------------------|---------------------|-------------------------|------------------|-------------------------|-------------------|--------------|
|     | <i>max_depth</i> | <i>learning_rate</i> | <i>n_estimators</i> | <i>min_child_weight</i> | <i>subsample</i> | <i>colsample_bytree</i> | <i>reg_lambda</i> | <i>gamma</i> |
| 1   | 8                | 0.17252              | 127                 | 7                       | 0.58651          | 0.60647                 | 4.02984           | 0.60724      |
| 2   | 8                | 0.22988              | 68                  | 9                       | 0.54811          | 0.91321                 | 2.29180           | 0.12852      |
| 3   | 8                | 0.10002              | 213                 | 10                      | 0.75238          | 0.64053                 | 4.99653           | 0.10778      |
| 4   | 4                | 0.12366              | 147                 | 5                       | 0.87463          | 0.83119                 | 0.63085           | 0.26995      |
| 5   | 5                | 0.23441              | 297                 | 7                       | 0.97266          | 0.36675                 | 0.34489           | 0.99034      |
| 6   | 4                | 0.20533              | 155                 | 4                       | 0.63974          | 0.56526                 | 2.63317           | 0.38177      |
| 7   | 5                | 0.10641              | 151                 | 3                       | 0.76094          | 0.79390                 | 0.98025           | 0.96160      |
| 8   | 4                | 0.17290              | 222                 | 4                       | 0.55589          | 0.76284                 | 1.62191           | 0.47379      |
| 9   | 4                | 0.05855              | 160                 | 3                       | 0.88818          | 0.79781                 | 4.98019           | 0.84983      |
| 10  | 4                | 0.11741              | 184                 | 5                       | 0.79714          | 0.83203                 | 4.43324           | 0.62777      |
| 11  | 4                | 0.16266              | 136                 | 2                       | 0.75690          | 0.93818                 | 3.30854           | 0.55481      |
| 12  | 5                | 0.23134              | 144                 | 2                       | 0.58373          | 0.60423                 | 2.76711           | 0.16986      |
| 13  | 8                | 0.27891              | 193                 | 7                       | 0.64977          | 0.89059                 | 3.88204           | 0.23152      |
| 14  | 7                | 0.18603              | 245                 | 8                       | 0.77290          | 0.78709                 | 3.45149           | 0.01806      |
| 15  | 5                | 0.16915              | 268                 | 10                      | 0.62385          | 0.49651                 | 2.30355           | 0.27120      |
| 16  | 4                | 0.20217              | 64                  | 2                       | 0.92784          | 0.78470                 | 0.94699           | 0.93657      |
| 17  | 5                | 0.10871              | 181                 | 9                       | 0.70489          | 0.84917                 | 4.43678           | 0.07228      |
| 18  | 5                | 0.07394              | 297                 | 8                       | 0.87839          | 0.62200                 | 3.24008           | 0.11160      |
| 19  | 6                | 0.20293              | 216                 | 9                       | 0.66381          | 0.89210                 | 4.08151           | 0.60613      |
| 20  | 7                | 0.20570              | 158                 | 4                       | 0.50653          | 0.86393                 | 3.36667           | 0.79227      |
| 21  | 5                | 0.20083              | 88                  | 7                       | 0.57460          | 0.62410                 | 1.26707           | 0.17321      |
| 22  | 4                | 0.27072              | 50                  | 4                       | 0.85604          | 0.86560                 | 0.16264           | 0.44052      |

|    |   |         |     |    |         |         |         |         |
|----|---|---------|-----|----|---------|---------|---------|---------|
| 23 | 8 | 0.15380 | 86  | 5  | 0.67811 | 0.74505 | 4.54334 | 0.93377 |
| 24 | 4 | 0.16205 | 183 | 6  | 0.59364 | 0.93969 | 1.05664 | 0.40669 |
| 25 | 6 | 0.14171 | 288 | 6  | 0.75389 | 0.85527 | 4.65363 | 0.50557 |
| 26 | 7 | 0.21287 | 253 | 9  | 0.59311 | 0.65113 | 2.79234 | 0.83703 |
| 27 | 4 | 0.15371 | 247 | 5  | 0.77890 | 0.52357 | 4.81584 | 0.67752 |
| 28 | 5 | 0.11665 | 135 | 5  | 0.79729 | 0.86017 | 4.26743 | 0.12912 |
| 29 | 4 | 0.08378 | 192 | 4  | 0.52749 | 0.79980 | 2.64816 | 0.57092 |
| 30 | 6 | 0.13030 | 210 | 3  | 0.50209 | 0.61548 | 3.80894 | 0.64347 |
| 31 | 7 | 0.24148 | 173 | 10 | 0.64711 | 0.79358 | 2.66441 | 0.23023 |
| 32 | 6 | 0.09301 | 204 | 8  | 0.69879 | 0.97301 | 4.67770 | 0.36945 |
| 33 | 5 | 0.12318 | 283 | 6  | 0.93580 | 0.70267 | 2.23369 | 0.17565 |
| 34 | 4 | 0.23289 | 227 | 7  | 0.60924 | 0.76662 | 2.97809 | 0.22066 |
| 35 | 6 | 0.21219 | 162 | 3  | 0.54969 | 0.50796 | 4.01790 | 0.10632 |
| 36 | 5 | 0.10657 | 148 | 3  | 0.77407 | 0.84022 | 4.19435 | 0.53237 |
| 37 | 4 | 0.14220 | 169 | 4  | 0.69411 | 0.90516 | 2.46148 | 0.83182 |
| 38 | 6 | 0.11224 | 239 | 4  | 0.64335 | 0.91879 | 1.53421 | 0.43750 |
| 39 | 5 | 0.08990 | 98  | 5  | 0.83843 | 0.99546 | 3.80815 | 0.86071 |
| 40 | 6 | 0.19006 | 130 | 4  | 0.95749 | 0.88483 | 3.68950 | 0.17261 |
| 41 | 5 | 0.21434 | 93  | 6  | 0.80593 | 0.97025 | 2.23769 | 0.40479 |
| 42 | 7 | 0.07619 | 234 | 6  | 0.62146 | 0.77954 | 4.62217 | 0.85628 |
| 43 | 4 | 0.17377 | 273 | 6  | 0.85218 | 0.79578 | 3.43808 | 0.62076 |
| 44 | 4 | 0.18522 | 135 | 4  | 0.82615 | 0.63563 | 4.24215 | 0.56409 |
| 45 | 4 | 0.14993 | 152 | 8  | 0.60441 | 0.80580 | 2.50467 | 0.09351 |
| 46 | 5 | 0.15229 | 164 | 7  | 0.94667 | 0.83661 | 3.59476 | 0.15891 |
| 47 | 5 | 0.15393 | 116 | 9  | 0.90651 | 0.85377 | 4.60433 | 0.89894 |
| 48 | 5 | 0.22272 | 290 | 9  | 0.86799 | 0.85502 | 4.52637 | 0.79836 |

|    |   |         |     |   |         |         |         |         |
|----|---|---------|-----|---|---------|---------|---------|---------|
| 49 | 5 | 0.11275 | 91  | 4 | 0.72730 | 0.75528 | 3.72672 | 0.17298 |
| 50 | 4 | 0.13702 | 299 | 7 | 0.95702 | 0.91622 | 2.93120 | 0.22371 |

---

58

59 **References**

60 Dumont Le Brazidec, J., Bocquet, M., Saunier, O., and Roustan, Y.: Quantification of uncertainties in the assessment of an  
61 atmospheric release source applied to the autumn 2017 106Ru event, *Atmos. Chem. Phys.*, 21, 13247–13267,  
62 <https://doi.org/10.5194/acp-21-13247-2021>, 2021.

63 Hansen, P. C. and O’Leary, D. P.: The Use of the L-Curve in the Regularization of Discrete Ill-Posed Problems, *SIAM J.*  
64 *Sci. Comput.*, 14, 1487–1503, <https://doi.org/10.1137/0914086>, 1993.

65
